# Supplementary material for: Gas-Phase Biosensors (Bio-Sniffers) for Measurement of 2-Nonenal, the Causative Volatile Molecule of Human Aging-Related Body Odor
Source: MDPI journal article supplement (doi:10.3390/s23135857), 2023-06-24
Supplement: s1 [file s1]

## **Supporting Information for**

### **Gas-phase biosensors (bio-sniffers) toward measurement of the causative volatile molecule of human aging odor 2-nonenal**

Kenta Iitani<sup>1</sup>, Hidehisa Mori<sup>2</sup>, Kenta Ichikawa<sup>1</sup>, Koji Toma<sup>1,3</sup>, Takahiro Arakawa<sup>1,4</sup>, Yasuhiko Iwasaki<sup>5</sup>, and Kohji Mitsubayashi<sup>1,2,\*</sup>

<sup>1</sup> Department of Biomedical Devices and Instrumentation, Institute of Biomaterials and Bioengineering, Tokyo Medical and Dental University, 2-3-10 Kanda-Surugadai, Chiyoda-ku, Tokyo 101-0062, Japan

<sup>2</sup> Graduate School of Medical and Dental Sciences, Tokyo Medical and Dental University, 1-5-45 Yushima, Bunkyo-ku, Tokyo 113-8510, Japan

<sup>3</sup> Department of Electronic Engineering, College of Engineering, Shibaura Institute of Technology, 3-7-5 Toyosu, Koto-ku, Tokyo 135-8548, Japan

<sup>4</sup> Department of Electric and Electronic Engineering, Tokyo University of Technology, 1404-1 Katakura, Hachioji City, Tokyo 192-0982, Japan

<sup>5</sup> Faculty of Chemistry, Materials and Bioengineering, Kansai University, 3-3-35 Yamate-Cho, Suita-Shi, Osaka 564-0836, Japan

\*Corresponding author: Kohji Mitsubayashi

**Email:** m.bdi@tmd.ac.jp

**This PDF file includes:**

Figures S1, Figure S2, Figure S3

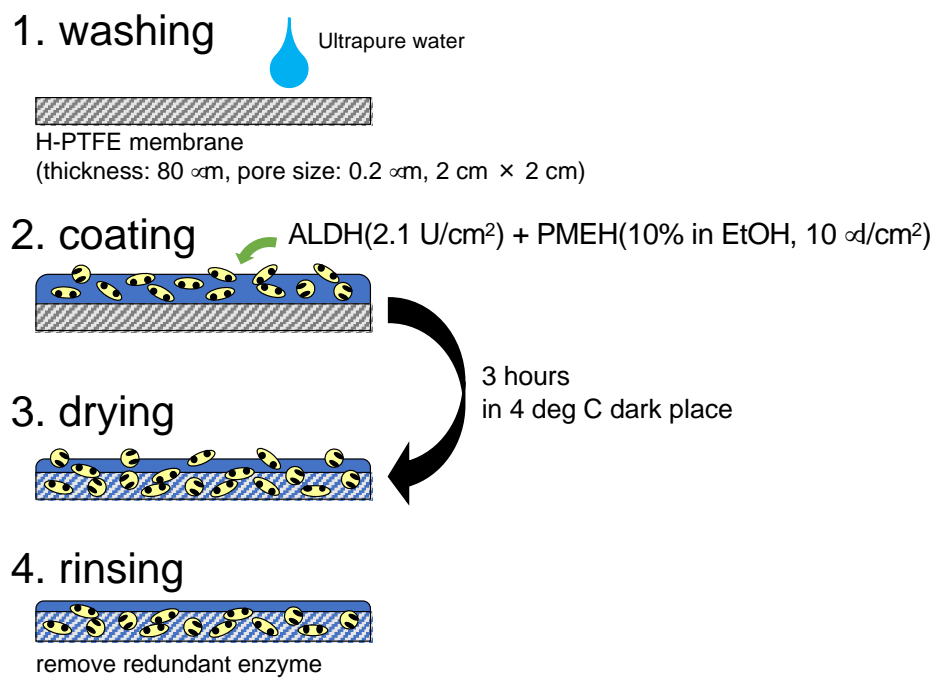

**Figure S1.** A preparation method of an ALDH-immobilized membrane

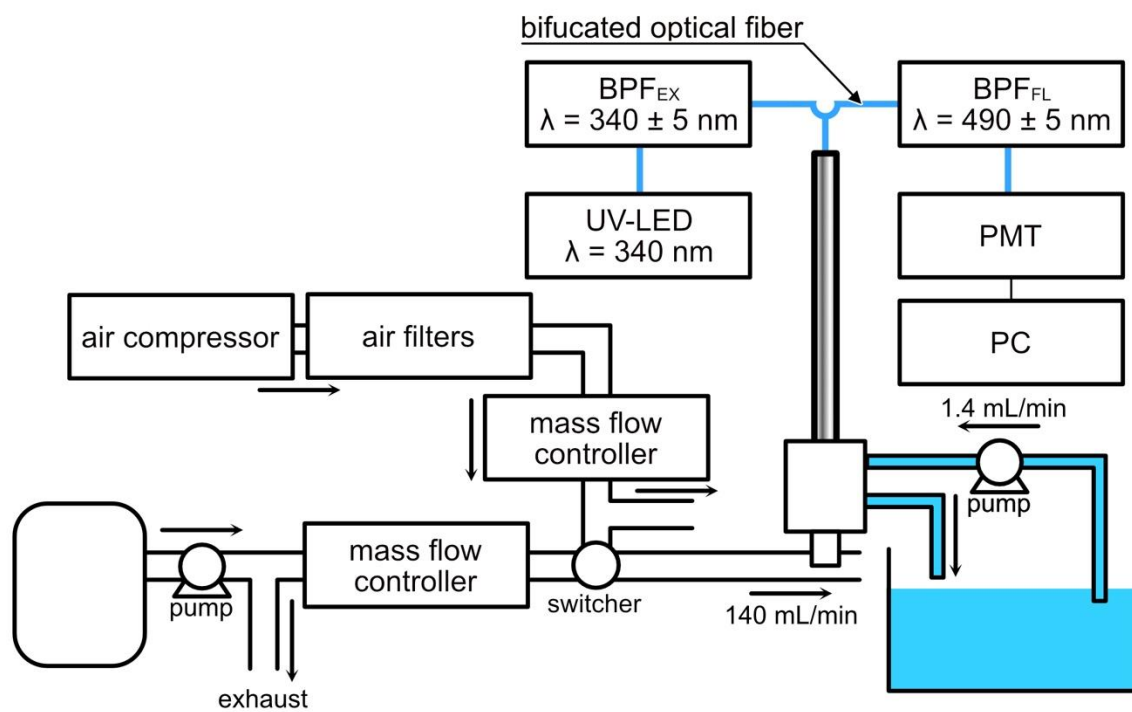

**Figure S2.** Experimental setup for measurement of *trans*-2-nonenal vapor

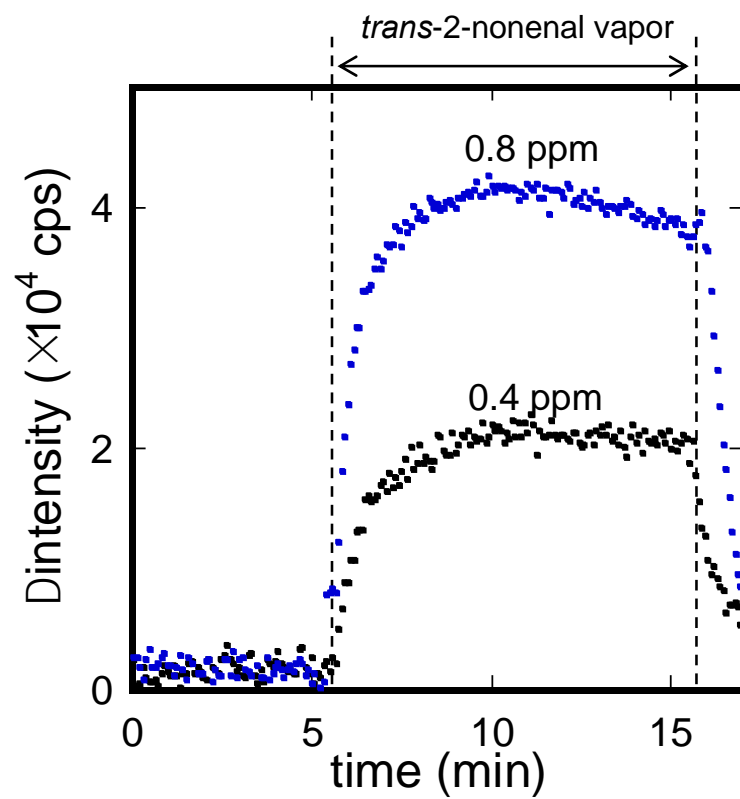

**Figure S3.** Time course of fluorescence intensity by applying *trans*-2-nonenal vapor against ER1 bio-sniffer.
